# Supplementary material for: Magnetically induced ring currents in naphthalene-fused heteroporphyrinoids
Source: Royal Society of Chemistry journal article supplement (doi:10.1039/d1cp02381k), 2021-01-01
Supplement: d1cp02381k1.pdf [file d1cp02381k1.pdf]

## Supporting Information

# Magnetically induced ring currents in naphthalene-fused heteroporphyrinoids

Markus Rauhalhti,<sup>a</sup> Dage Sundholm,<sup>a</sup> and Mikael P. Johansson<sup>b,a</sup>

### 1 Ring-current strengths

Ring currents and pathways computed using three different functionals with varying amount of Hartree–Fock exchange: BP (0%), PBE0 (25%), and BHandHLYP (50%). See main paper for computational details.

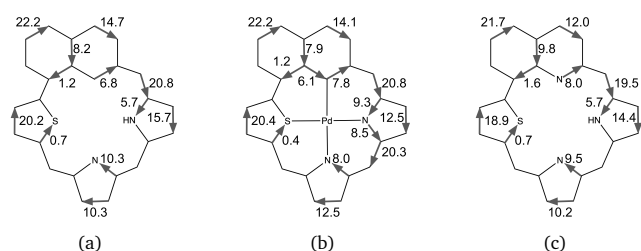

**Figure S1** Integrated current strengths (in nA/T) and current pathways of (a) 1, (b) 2, and (c) 3, calculated using the BP functional.

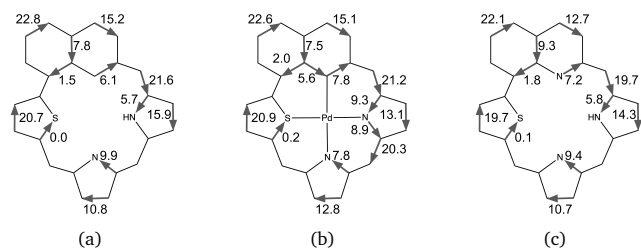

**Figure S2** Integrated current strengths (in nA/T) and current pathways of (a) 1, (b) 2, and (c) 3, calculated using the PBE0 functional.

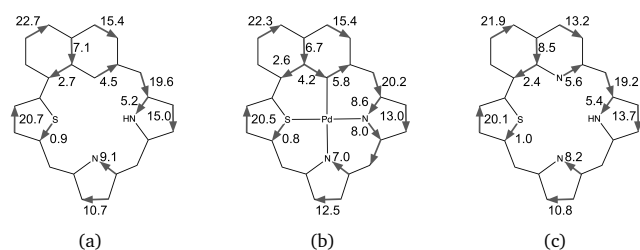

**Figure S3** Integrated current strengths (in nA/T) and current pathways of (a) 1, (b) 2, and (c) 3, calculated using the BHandHLYP functional.

<sup>a</sup> University of Helsinki, Department of Chemistry, Faculty of Science, P.O. Box 55 (A.I. Virtanens plats 1), FI-00014 University of Helsinki, Finland, Markus.Rauhalhti@helsinki.fi, Dage.Sundholm@helsinki.fi

<sup>b</sup> CSC – IT Center for Science Ltd., P.O. Box 405, FI-02101 Espoo, Finland, mikael.johansson@csc.fi

## 2 Cartesian coordinates of the molecules

Standard XYZ format in Ångström units.

### 2.1 Molecule 1

44

1, optimized at RI-BP86-D3(BJ)/def2-SVP level

|   |            |            |            |
|---|------------|------------|------------|
| S | -1.5606620 | -0.3809090 | 0.0955140  |
| N | 0.6224920  | -2.1293530 | 0.0703760  |
| N | 2.0026620  | 0.4653790  | -0.0108990 |
| H | 1.0517380  | 0.0783040  | 0.0682680  |
| C | -3.0814520 | 0.4903290  | -0.0693770 |
| C | -4.1384280 | -0.4412660 | -0.2194700 |
| H | -5.1853010 | -0.1424200 | -0.3551010 |
| C | -3.7334800 | -1.7801170 | -0.1914210 |
| H | -4.4171480 | -2.6344400 | -0.2919400 |
| C | -2.3380400 | -1.9494570 | -0.0342670 |
| C | -1.5965810 | -3.1491150 | -0.0104410 |
| C | -0.1991780 | -3.2312610 | 0.0433910  |
| C | 0.5886580  | -4.4658530 | 0.0275920  |
| H | 0.1819840  | -5.4847810 | 0.0074080  |
| C | 1.9045780  | -4.0767610 | 0.0345740  |
| H | 2.8000530  | -4.7107970 | 0.0184850  |
| C | 1.8944960  | -2.6085380 | 0.0507720  |
| C | 3.0503560  | -1.7933560 | 0.0111590  |
| C | 3.0910850  | -0.3974480 | -0.0311100 |
| C | 4.2780000  | 0.4210130  | -0.1002070 |
| H | 5.2983500  | 0.0229020  | -0.1346610 |
| C | 3.8814640  | 1.7370650  | -0.1114520 |
| H | 4.5155230  | 2.6299290  | -0.1580560 |
| C | 2.4311530  | 1.7903510  | -0.0502340 |
| C | 1.7456440  | 3.0065630  | -0.0107190 |
| C | 0.3640360  | 3.3797350  | 0.0619090  |
| C | -0.7181140 | 2.4841610  | -0.0808920 |
| H | -0.4753890 | 1.4594000  | -0.3712420 |
| C | -2.0718060 | 2.8658070  | 0.0617680  |
| C | -3.1994190 | 1.9359080  | 0.0100010  |
| C | -4.5039770 | 2.4813310  | 0.0927230  |
| H | -5.3668710 | 1.8035920  | 0.0621180  |
| C | -4.7449620 | 3.8508330  | 0.2571890  |
| H | -5.7813370 | 4.2137940  | 0.3245180  |
| C | -3.6763450 | 4.7444640  | 0.3660720  |
| H | -3.8558920 | 5.8189630  | 0.5235420  |
| C | -2.3478840 | 4.2790080  | 0.2773970  |
| C | -1.2489050 | 5.1925500  | 0.3839550  |
| H | -1.4755520 | 6.2577730  | 0.5458780  |
| C | 0.0549350  | 4.7673610  | 0.2935040  |
| H | 0.8827630  | 5.4861540  | 0.3940560  |
| H | -2.1686690 | -4.0881130 | -0.0700500 |
| H | 4.0259960  | -2.3001680 | -0.0088740 |
| H | 2.4400290  | 3.8617650  | 0.0024450  |

## 2.2 Molecule 2

43

2, optimized at RI-BP86-D3(BJ)/def2-SVP level

|    |            |            |            |
|----|------------|------------|------------|
| Pd | 0.0987150  | 0.1235990  | 0.1478320  |
| S  | -2.0316310 | -0.1340380 | 0.6683090  |
| N  | 0.2122200  | -2.0456780 | 0.1207090  |
| N  | 2.1242260  | 0.2034500  | -0.0526630 |
| C  | -3.1138590 | 0.9821640  | -0.1112400 |
| C  | -4.1889100 | 0.2651880  | -0.6584050 |
| H  | -5.0311070 | 0.7553510  | -1.1641150 |
| C  | -4.0432230 | -1.1388410 | -0.5902510 |
| H  | -4.7613830 | -1.8514750 | -1.0187630 |
| C  | -2.8258790 | -1.5545170 | -0.0231470 |
| C  | -2.1858510 | -2.8022750 | 0.0329770  |
| C  | -0.8052790 | -3.0024120 | 0.1480620  |
| C  | -0.2236810 | -4.3352010 | 0.1754320  |
| H  | -0.8063490 | -5.2638600 | 0.2006840  |
| C  | 1.1361680  | -4.1801460 | 0.1457950  |
| H  | 1.9128010  | -4.9543360 | 0.1402490  |
| C  | 1.3959430  | -2.7500220 | 0.0935520  |
| C  | 2.6785340  | -2.2091770 | -0.0354490 |
| C  | 3.0023700  | -0.8512190 | -0.1288680 |
| C  | 4.3564580  | -0.3379880 | -0.2727210 |
| H  | 5.2509430  | -0.9656440 | -0.3641000 |
| C  | 4.2705420  | 1.0317400  | -0.2609970 |
| H  | 5.0793680  | 1.7680330  | -0.3371300 |
| C  | 2.8627330  | 1.3578840  | -0.1087280 |
| C  | 2.3372420  | 2.6274820  | 0.0336800  |
| C  | 0.9825800  | 3.0472340  | 0.1807890  |
| C  | -0.2036200 | 2.2242320  | 0.1360690  |
| C  | -1.4796540 | 2.9432240  | 0.1445790  |
| C  | -2.8299260 | 2.3839690  | -0.0312080 |
| C  | -3.9752910 | 3.2114570  | -0.1363910 |
| H  | -4.9529500 | 2.7242810  | -0.2525840 |
| C  | -3.9151670 | 4.5988560  | -0.0307530 |
| H  | -4.8285260 | 5.2079020  | -0.0958090 |
| C  | -2.6708580 | 5.1819170  | 0.1905880  |
| H  | -2.5759100 | 6.2735590  | 0.2950420  |
| C  | -1.4904690 | 4.4088100  | 0.2688500  |
| C  | -0.2759260 | 5.1355070  | 0.4330680  |
| H  | -0.3218130 | 6.2263400  | 0.5679670  |
| C  | 0.9119860  | 4.4776440  | 0.3647350  |
| H  | 1.8589420  | 5.0326950  | 0.4427580  |
| H  | 3.5143950  | -2.9213810 | -0.0778930 |
| H  | 3.0858490  | 3.4339440  | 0.0278330  |
| H  | -2.8012930 | -3.7007150 | -0.1294180 |

### 2.3 Molecule 3

3, optimized at RI-BP86-D3(BJ)/def2-SVP level

|   |            |            |           |
|---|------------|------------|-----------|
| S | 0.1124823  | 1.3607543  | 0.0000000 |
| N | 2.9259659  | 0.7973230  | 0.0000000 |
| N | 1.7316024  | -1.7581160 | 0.0000000 |
| H | 1.4801492  | -0.7561674 | 0.0000000 |
| C | -1.4837123 | 2.0936717  | 0.0000000 |
| C | -1.3841951 | 3.5073934  | 0.0000000 |
| H | -2.2584687 | 4.1694338  | 0.0000000 |
| C | -0.0738243 | 3.9813307  | 0.0000000 |
| H | 0.2023014  | 5.0451057  | 0.0000000 |
| C | 0.8946664  | 2.9499118  | 0.0000000 |
| C | 2.2905725  | 3.1419441  | 0.0000000 |
| C | 3.2545437  | 2.1279385  | 0.0000000 |
| C | 4.7078752  | 2.3055621  | 0.0000000 |
| H | 5.2373014  | 3.2666190  | 0.0000000 |
| C | 5.2438559  | 1.0406716  | 0.0000000 |
| H | 6.3025934  | 0.7523810  | 0.0000000 |
| C | 4.1027118  | 0.1193548  | 0.0000000 |
| C | 4.1697521  | -1.2938379 | 0.0000000 |
| C | 3.0651456  | -2.1461143 | 0.0000000 |
| C | 3.0901513  | -3.5902175 | 0.0000000 |
| H | 4.0067086  | -4.1908711 | 0.0000000 |
| C | 1.7885431  | -4.0283475 | 0.0000000 |
| H | 1.4257387  | -5.0626785 | 0.0000000 |
| C | 0.9085278  | -2.8680660 | 0.0000000 |
| C | -0.4781046 | -3.0206805 | 0.0000000 |
| C | -1.6338860 | -2.1724779 | 0.0000000 |
| C | -2.7541461 | -0.1169550 | 0.0000000 |
| C | -2.7158256 | 1.3396895  | 0.0000000 |
| C | -3.9477315 | 2.0399076  | 0.0000000 |
| H | -3.9363921 | 3.1373052  | 0.0000000 |
| C | -5.1876797 | 1.3918879  | 0.0000000 |
| H | -6.1121076 | 1.9881458  | 0.0000000 |
| C | -5.2472706 | -0.0049150 | 0.0000000 |
| H | -6.2149427 | -0.5300190 | 0.0000000 |
| C | -4.0592196 | -0.7616097 | 0.0000000 |
| C | -4.0786246 | -2.1897397 | 0.0000000 |
| H | -5.0473243 | -2.7132882 | 0.0000000 |
| C | -2.8965698 | -2.8815277 | 0.0000000 |
| H | -2.8879592 | -3.9812520 | 0.0000000 |
| H | 2.6424139  | 4.1861499  | 0.0000000 |
| H | 5.1602486  | -1.7705434 | 0.0000000 |
| H | -0.7493009 | -4.0873553 | 0.0000000 |
| N | -1.5965660 | -0.8177018 | 0.0000000 |

### 3 NMR shielding constants at BP level

#### 3.1 Molecule 1

| #  | NO. | TYPE        | ISOTROPIC    |
|----|-----|-------------|--------------|
|    | 1   | S           | 206.01933632 |
|    | 2   | N           | -22.54259583 |
|    | 3   | N           | 105.03597948 |
|    | 4   | H           | 33.31148450  |
|    | 5   | C           | 26.34591268  |
|    | 6   | C           | 53.86443679  |
|    | 7   | H           | 20.24745623  |
|    | 8   | C           | 50.02286186  |
|    | 9   | H           | 21.35782371  |
| 10 | C   | 35.29507336 |              |
| 11 | C   | 62.62873363 |              |
| 12 | C   | 24.37144648 |              |
| 13 | C   | 43.27216180 |              |
| 14 | H   | 22.20542247 |              |
| 15 | C   | 44.99489398 |              |
| 16 | H   | 22.30900351 |              |
| 17 | C   | 20.97414280 |              |
| 18 | C   | 77.66116372 |              |
| 19 | C   | 35.73394807 |              |
| 20 | C   | 51.53323556 |              |
| 21 | H   | 22.14507773 |              |
| 22 | C   | 45.29524774 |              |
| 23 | H   | 21.98654213 |              |
| 24 | C   | 40.52471050 |              |
| 25 | C   | 67.84278054 |              |
| 26 | C   | 45.05181247 |              |
| 27 | C   | 56.52080529 |              |
| 28 | H   | 34.22523274 |              |
| 29 | C   | 52.93824481 |              |
| 30 | C   | 51.37205034 |              |
| 31 | C   | 53.97201078 |              |
| 32 | H   | 19.78789382 |              |
| 33 | C   | 57.21862061 |              |
| 34 | H   | 21.92008073 |              |
| 35 | C   | 53.73591369 |              |
| 36 | H   | 21.65777280 |              |
| 37 | C   | 45.57426735 |              |
| 38 | C   | 46.85724682 |              |
| 39 | H   | 21.70431521 |              |
| 40 | C   | 46.14980061 |              |
| 41 | H   | 21.60156400 |              |
| 42 | H   | 20.91192726 |              |
| 43 | H   | 21.73519299 |              |
| 44 | H   | 21.24175600 |              |

### 3.2 Molecule 2

|    |    |              |
|----|----|--------------|
| 1  | Pd | 131.65165551 |
| 2  | S  | 266.21610935 |
| 3  | N  | 58.39843414  |
| 4  | N  | 46.94575209  |
| 5  | C  | 34.55225062  |
| 6  | C  | 57.72285032  |
| 7  | H  | 21.55095540  |
| 8  | C  | 53.63973287  |
| 9  | H  | 21.99460550  |
| 10 | C  | 31.19771755  |
| 11 | C  | 68.98129750  |
| 12 | C  | 28.22972397  |
| 13 | C  | 45.44968789  |
| 14 | H  | 22.35493871  |
| 15 | C  | 44.74530161  |
| 16 | H  | 22.26213055  |
| 17 | C  | 31.68105859  |
| 18 | C  | 76.14148441  |
| 19 | C  | 33.41246936  |
| 20 | C  | 46.51942289  |
| 21 | H  | 22.23134082  |
| 22 | C  | 46.02056056  |
| 23 | H  | 22.14160669  |
| 24 | C  | 38.64689144  |
| 25 | C  | 50.56212939  |
| 26 | C  | 43.84298460  |
| 27 | C  | 8.84841226   |
| 28 | C  | 43.29963935  |
| 29 | C  | 49.86065078  |
| 30 | C  | 53.87756659  |
| 31 | H  | 20.06151785  |
| 32 | C  | 56.77739129  |
| 33 | H  | 22.03029692  |
| 34 | C  | 49.47430323  |
| 35 | H  | 21.59680239  |
| 36 | C  | 42.11150383  |
| 37 | C  | 48.67609319  |
| 38 | H  | 21.88225277  |
| 39 | C  | 39.96081956  |
| 40 | H  | 21.42726048  |
| 41 | H  | 21.75409668  |
| 42 | H  | 20.92168928  |
| 43 | H  | 21.05296347  |

### 3.3 Molecule 3

|    |   |              |
|----|---|--------------|
| 1  | S | 180.88590940 |
| 2  | N | -29.73809193 |
| 3  | N | 97.89244949  |
| 4  | H | 31.70192869  |
| 5  | C | 26.01109257  |
| 6  | C | 53.56125030  |
| 7  | H | 20.36251439  |
| 8  | C | 45.75126256  |
| 9  | H | 21.36598590  |
| 10 | C | 28.76132368  |
| 11 | C | 57.50477121  |
| 12 | C | 24.85425659  |
| 13 | C | 43.50685648  |
| 14 | H | 22.33003140  |
| 15 | C | 46.02260606  |
| 16 | H | 22.48723223  |
| 17 | C | 20.64115302  |
| 18 | C | 75.59991624  |
| 19 | C | 34.94966642  |
| 20 | C | 50.02885543  |
| 21 | H | 22.27945396  |
| 22 | C | 44.77851240  |
| 23 | H | 22.21534960  |
| 24 | C | 39.50722786  |
| 25 | C | 69.85204758  |
| 26 | C | 29.20136398  |
| 27 | C | 35.21817985  |
| 28 | C | 50.57215577  |
| 29 | C | 54.71908629  |
| 30 | H | 19.95069159  |
| 31 | C | 57.91955382  |
| 32 | H | 22.17190925  |
| 33 | C | 55.93534341  |
| 34 | H | 22.05679401  |
| 35 | C | 50.86135583  |
| 36 | C | 42.48842911  |
| 37 | H | 21.91740334  |
| 38 | C | 46.06325304  |
| 39 | H | 21.84949691  |
| 40 | H | 20.88419747  |
| 41 | H | 21.97407084  |
| 42 | H | 21.49484078  |
| 43 | N | -61.90348368 |
